# Supplementary material
Source: ML conference proceedings conference paper supplement (https://openreview.net/forum?id=bTidcHIK2t)
Supplement: supplementary_material [file attachment]

## Appendix A: Experimental Details and Hyperparameter

**1. DeepMind Control Suite.** DeepMind Control Suite is a collection of continuous control tasks that involve the manipulation of high-dimensional systems [16]. The objective of the agent is to learn how to effectively control the environment in order to achieve specific goals. Our experiments focused on nine distinct environments, which are detailed in Table 2. For a comprehensive listing of the hyperparameters utilized in our research, please refer to Table 1.

| Hyperparameters                     | Value                                   |
|-------------------------------------|-----------------------------------------|
| # of ensemble agents                | 2                                       |
| Training steps                      | $1 \times 10^6$                         |
| Discount factor                     | 0.99                                    |
| Initial collection steps            | 5000                                    |
| Minibatch size                      | 1024                                    |
| Optimizer (all)                     | Adam                                    |
| Optimizer (all) : learning rate     | 0.0001 humanoid-run<br>0.0003 otherwise |
| Networks (all) : activation         | ReLU                                    |
| Networks (all) : n. hidden layers   | 2                                       |
| Networks (all) : hidden units       | 1024                                    |
| Initial Temperature                 | 1                                       |
| Replay Buffer Size                  | $1 \times 10^6$                         |
| Updates per step (Replay Ratio)     | (1, 2, 4)                               |
| Target network update period        | 1                                       |
| $\tau$                              | 0.005                                   |
| Reset Interval (gradient steps)     | $4 \times 10^5$                         |
| $\beta$ (action select coefficient) | 50                                      |

Table 1: Hyperparameters for RDE+SAC on DeepMind Control Suite.

| Environment | Task      |
|-------------|-----------|
| acrobot     | swingup   |
| cheetah     | run       |
| finger      | turn_hard |
| fish        | swim      |
| hopper      | hop       |
| humanoid    | run       |
| quadruped   | run       |
| swimmer     | swimmer15 |
| walker      | run       |

Table 2: The tasks of DMC

399 **2. Atari 100k.** Atari 100k is a benchmark that tests an agent’s abilities by allowing it to interact  
400 with 100k environment steps (equivalent to 400k frames with a frameskip of 4) in 26 Atari games [4].  
401 Each game has different mechanics, providing a diverse evaluation of the agent’s capabilities. The  
402 benchmark imposes a restriction of 100k actions per environment, which roughly corresponds to 2  
403 hours of human gameplay. The hyperparameters and values are listed in Table 3 and Table 4.

| Reset Interval  | Environments                                                                                                                             |
|-----------------|------------------------------------------------------------------------------------------------------------------------------------------|
| $4 \times 10^4$ | Assault, Asterix, Battle Zone, Boxing, Crazy Climber, Freeway, Frostbite, Krull, Ms Pacman, Qbert, Road Runner, Seaquest, Up N Down      |
| $8 \times 10^4$ | Alien, Amidar, Bank Heist, Breakout, Chopper Command, Demon Attack, Gopher, Hero, Jamesbond, Kangaroo, Kung Fu Master, Pong, Private Eye |

Table 3: Reset Interval in terms of the gradient step for each environment of Atari-100k

| Hyperparameters                     | Value                                                                                    |
|-------------------------------------|------------------------------------------------------------------------------------------|
| # of ensemble agents                | 2                                                                                        |
| Gray-scaling                        | True                                                                                     |
| Observation down-sampling           | $84 \times 84$                                                                           |
| Frames stacked                      | 4                                                                                        |
| Action repetitions                  | 4                                                                                        |
| Reward clipping                     | $[-1, 1]$                                                                                |
| Terminal on loss of life            | True                                                                                     |
| Max gradient norm                   | 10                                                                                       |
| Replay periode every                | 1 step                                                                                   |
| Training steps                      | $1 \times 10^5$                                                                          |
| Discount factor                     | 0.99                                                                                     |
| Initial collection steps            | $1 \times 10^4$                                                                          |
| Minibatch size                      | 32                                                                                       |
| Optimizer                           | Adam                                                                                     |
| Optimizer : learning rate           | 0.0001                                                                                   |
| Q network : channels                | 32, 64, 64                                                                               |
| Q network : filter size             | $8 \times 8, 4 \times 4, 3 \times 3$                                                     |
| Q network : stride                  | 4, 2, 1                                                                                  |
| Q network : activation              | ReLU                                                                                     |
| Q network : hidden units            | 512                                                                                      |
| Replay Buffer Size                  | $1 \times 10^5$                                                                          |
| Updates per step (Replay Ratio)     | (1, 2, 4)                                                                                |
| Target network update period        | 1                                                                                        |
| Exploration                         | $\epsilon$ -greedy                                                                       |
| $\epsilon$ -decay                   | $1 \times 10^4$                                                                          |
| $\tau$                              | 0.005                                                                                    |
| $\beta$ (action select coefficient) | 50                                                                                       |
| Reset depth                         | last 2 layers: Amidar, Bank Heist<br>Freeway, Frostbite, Hero<br>last 1 layer: otherwise |

Table 4: Hyperparameters for RDE+DQN on Atari 100k.

404 **3. MiniGrid.** MiniGrid is a collection of goal-oriented, 2D grid-world environments [5]. Each  
 405 interaction step results in the agent receiving a sparse reward denoted as  $R_1$ , which is subject to a  
 406 small decrement. In this paper, we have set the reward value as  $R_1 = 10$ . We considered 5 tasks in  
 407 MiniGrid: FourRooms, SimpleCrossingS9N1, LavaCrossingS9N1, SimpleCrossingS9N1, and  
 408 GoToDoor-8x8. We now provide the details of each environment.

409 **FourRooms** This environment is designed with four rooms and comprises of a single agent and  
 410 a green goal. At the start of each episode, both the agent and the green goal are randomly placed  
 411 within the four rooms. The goal of the agent is to navigate through the environment and ultimately  
 412 reach the green goal.

413 **SimpleCrossingS9N1, LavaCrossingS9N1** This environment is designed with two rooms that are  
 414 blocked by obstacles, such as lava (for LavaCrossing) and walls (for SimpleCrossing). The objective  
 415 for the agent is to successfully reach a goal while avoiding these obstacles. In LavaCrossing, the  
 416 episode comes to an end if the agent collides with the obstacle, whereas in SimpleCrossing, the  
 417 episode continues despite the collision.

418 **GoToDoor-8x8** This environment is designed with a single room, four doors, and a single mission  
 419 text string. The string provides instructions on which door the agent should reach.

420 **LavaGapS7** This environment is designed with a single room, a strip of lava, and a green goal. The  
 421 objective for the agent is to successfully reach the goal while avoiding the lava.

422 We provide the hyperparameters used in MiniGrid as follows.

| Hyperparameters                     | Value                                                                                            |
|-------------------------------------|--------------------------------------------------------------------------------------------------|
| $\epsilon$                          | $0.9 \rightarrow 0.05$                                                                           |
| $\epsilon$ -decay time step         | $10^5$                                                                                           |
| target update period                | $10^3$                                                                                           |
| Replay buffer size                  | $5 \times 10^5$                                                                                  |
| Mini-batch size                     | 256                                                                                              |
| Optimizer                           | RMSPProp                                                                                         |
| Learning rate                       | 0.0001                                                                                           |
| The maximum number of steps         | 100                                                                                              |
| Reset Interval (gradient steps)     | $2 \times 10^5$ (GoToDoor, LavaCrossing, LavaGap)<br>$1 \times 10^5$ (FourRooms, SimpleCrossing) |
| $\beta$ (action select coefficient) | 50                                                                                               |

Table 5: Hyperparameters in MiniGrid.

## Appendix B: Experimental Results

We provide the entire results of DQN, SR+DQN, and RDE+DQN on Atari 100k and Minigird in Table 6 and Table 7, respectively. We report the per-environment learning curves of Minigird in Fig. 9. The learning curves of DMC are provided in Fig. 7 and Fig. 8.

| RR              | 1       |         |               | 2             |         |               | 4            |              |                |
|-----------------|---------|---------|---------------|---------------|---------|---------------|--------------|--------------|----------------|
| Game            | DQN     | SR+DQN  | RDE+DQN       | DQN           | SR+DQN  | RDE+DQN       | DQN          | SR+DQN       | RDE+DQN        |
| Alien           | 423.2   | 512.4   | 414.4         | 596.6         | 506.4   | 502.4         | 414.0        | <b>639.6</b> | 610.0          |
| Amidar          | 46.8    | 43.2    | 47.8          | 54.6          | 58.2    | <b>68.2</b>   | 31.6         | 66.4         | 55.2           |
| Assault         | 438.8   | 354.5   | 409.1         | 409.9         | 369.2   | 431.8         | 372.1        | 455.3        | <b>462.0</b>   |
| Asterix         | 418.0   | 352.0   | 426.0         | 394.0         | 482.0   | <b>612.0</b>  | 306.0        | 470.0        | 590.0          |
| Bank Heist      | 14.0    | 13.6    | 16.8          | 23.2          | 27.2    | 21.2          | 14.4         | 26.8         | <b>33.6</b>    |
| Battle Zone     | 4040.0  | 3360.0  | 4040.0        | 2120.0        | 4520.0  | 7880.0        | 3840.0       | 7000.0       | <b>8240.0</b>  |
| Boxing          | 1.4     | -7.7    | -2.6          | 0.8           | -0.6    | 4.2           | <b>5.1</b>   | 3.6          | 1.9            |
| Breakout        | 16.1    | 6.7     | 16.1          | 19.6          | 15.0    | 21.2          | <b>23.8</b>  | 20.8         | 19.5           |
| Chopper Command | 828.0   | 836.0   | 760.0         | <b>1324.0</b> | 1120.0  | 1000.0        | 1080.0       | 1024.0       | 1044.0         |
| Crazy Climber   | 12472.0 | 16240.0 | 22556.0       | 22100.0       | 22216.0 | 25784.0       | 16028.0      | 25072.0      | <b>56324.0</b> |
| Demon Attack    | 490.8   | 166.8   | 324.6         | <b>1492.4</b> | 184.4   | 652.4         | 1088.4       | 355.6        | 284.8          |
| Freeway         | 15.1    | 7.2     | 4.0           | 10.9          | 6.4     | 16.8          | 14.8         | 7.9          | <b>21.2</b>    |
| Frostbite       | 233.6   | 158.4   | 197.6         | 206.4         | 206.8   | 348.0         | 116.4        | 264.4        | <b>271.6</b>   |
| Gopher          | 225.6   | 388.0   | 381.6         | 460.8         | 577.6   | 535.2         | 434.0        | <b>876.8</b> | 868.0          |
| Hero            | 621.6   | 738.4   | 1698.6        | 1068.8        | 2725.6  | 2819.4        | 754.0        | 3073.2       | <b>3564.2</b>  |
| Jamesbond       | 68.0    | 70.0    | 126.0         | <b>178.0</b>  | 50.0    | 138.0         | 140.0        | 92.0         | 78.0           |
| Kangaroo        | 168.0   | 72.0    | 104.0         | 160.0         | 128.0   | 168.0         | 48.0         | 104.0        | <b>176.0</b>   |
| Krull           | 1905.2  | 2262.4  | <b>5325.6</b> | 2637.5        | 2460.4  | 1854.0        | 2533.6       | 3144.0       | 3374.0         |
| Kung Fu Master  | 8264.0  | 5908.0  | 7256.0        | 6244.0        | 8216.0  | 7524.0        | 6008.0       | 7996.0       | <b>8284.0</b>  |
| Ms Pacman       | 790.0   | 769.6   | 609.6         | 907.2         | 832.0   | 831.6         | 868.4        | 954.8        | <b>1223.2</b>  |
| Pong            | -20.7   | -20.7   | -20.8         | -19.1         | -18.8   | -19.5         | <b>-14.4</b> | -17.0        | -18.8          |
| Private Eye     | 20.0    | 2.1     | 44.0          | 44.0          | -69.1   | 64.0          | 0.0          | 40.0         | <b>83.5</b>    |
| Qbert           | 457.0   | 388.0   | 415.0         | 497.0         | 489.0   | 436.0         | 615.0        | 467.0        | <b>941.0</b>   |
| Road Runner     | 2288.0  | 1840.0  | 1468.0        | 2288.0        | 1940.0  | <b>3488.0</b> | 1680.0       | 1684.0       | 2132.0         |
| Seaquest        | 292.0   | 222.4   | 243.2         | 207.2         | 240.0   | 337.6         | 216.0        | 341.6        | <b>372.0</b>   |
| Up N Down       | 1396.8  | 1068.8  | 1734.4        | 1756.0        | 1769.2  | <b>2258.0</b> | 1662.4       | 1472.4       | 1503.6         |
| IQM             | 1.000   | 0.852   | 0.985         | 1.186         | 1.024   | 1.384         | 1.027        | 1.282        | 1.381          |
| Mean            | 1.000   | 0.602   | 1.074         | 1.314         | 1.005   | 1.632         | 1.159        | 1.527        | 1.831          |

Table 6: Results on Atari-100k

| RR                 | 0.5   |        |              | 1     |        |              | 2     |        |         |
|--------------------|-------|--------|--------------|-------|--------|--------------|-------|--------|---------|
| Game               | DQN   | SR+DQN | RDE+DQN      | DQN   | SR+DQN | RDE+DQN      | DQN   | SR+DQN | RDE+DQN |
| GoToDoor-8x8       | 0.709 | 0.71   | 0.911        | 0.544 | 0.659  | <b>0.944</b> | 0.159 | 0.684  | 0.929   |
| LavaCrossing       | 0.035 | 0      | <b>0.248</b> | 0.016 | 0.02   | 0.215        | 0.029 | 0      | 0.237   |
| SimpleCrossingS9N1 | 0     | 0.012  | <b>0.186</b> | 0     | 0.013  | 0.159        | 0     | 0.014  | 0.137   |
| FourRooms          | 0.002 | 0.03   | 0.148        | 0     | 0.072  | <b>0.159</b> | 0     | 0.034  | 0.155   |
| LavaGapS7          | 0.747 | 0.655  | 0.793        | 0.761 | 0.729  | <b>0.793</b> | 0.674 | 0.706  | 0.791   |

Table 7: Results on MiniGrid

## 427 **Appendix C: Reset depth for Continuous Environments**

428 In Section 4.3, we investigate the impact of reset depth in Minigird environment. In order to demon-  
429 strate the effect in continuous tasks, we compare the performance of RDE+DQN using two different  
430 reset depth: *reset-1*, which only resets the last layer, and *reset-all*, which entails a complete reset  
431 of all layers in the DeepMind Control Suite. As shown in Figure 10, we observe that for sev-  
432 eral tasks such as cheetah-run, finger-turn\_hard, hopper-hop, swimmer-swimmer15,  
433 walker-run, *reset-1* exhibits comparable performance to *reset-all*. However, for the remain-  
434 ing tasks, namely acrobot-swingup, fish-swim, humanoid-run, quadruped-run, *reset-1*  
435 demonstrates inferior performance compared to *reset-all*. Furthermore, in the cases of fish-swim,  
436 humanoid-run, swimmer-swimmer15, the performance of *reset-1* deteriorates with increasing  
437 replay ratio, suggesting that shallower levels of resetting render it more susceptible to primacy bias.

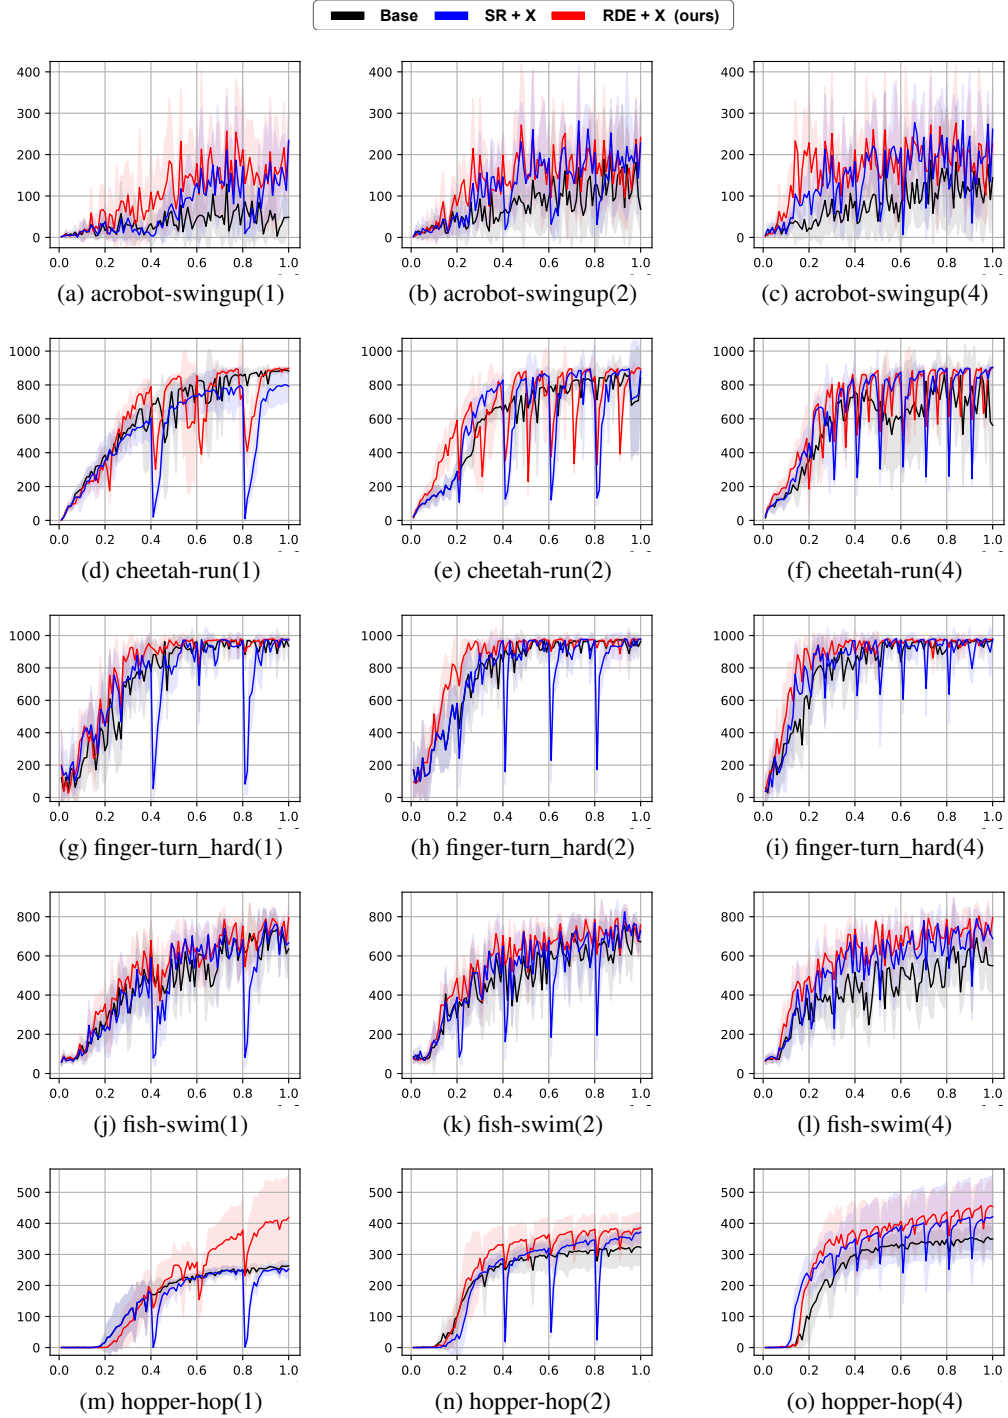

Figure 7: Per-environment performance in DMC with varying replay ratio values. Note that the number in parentheses indicates the replay ratio. The scale of the x-axis is  $10^6$ . Performances are averaged over 5 seeds.

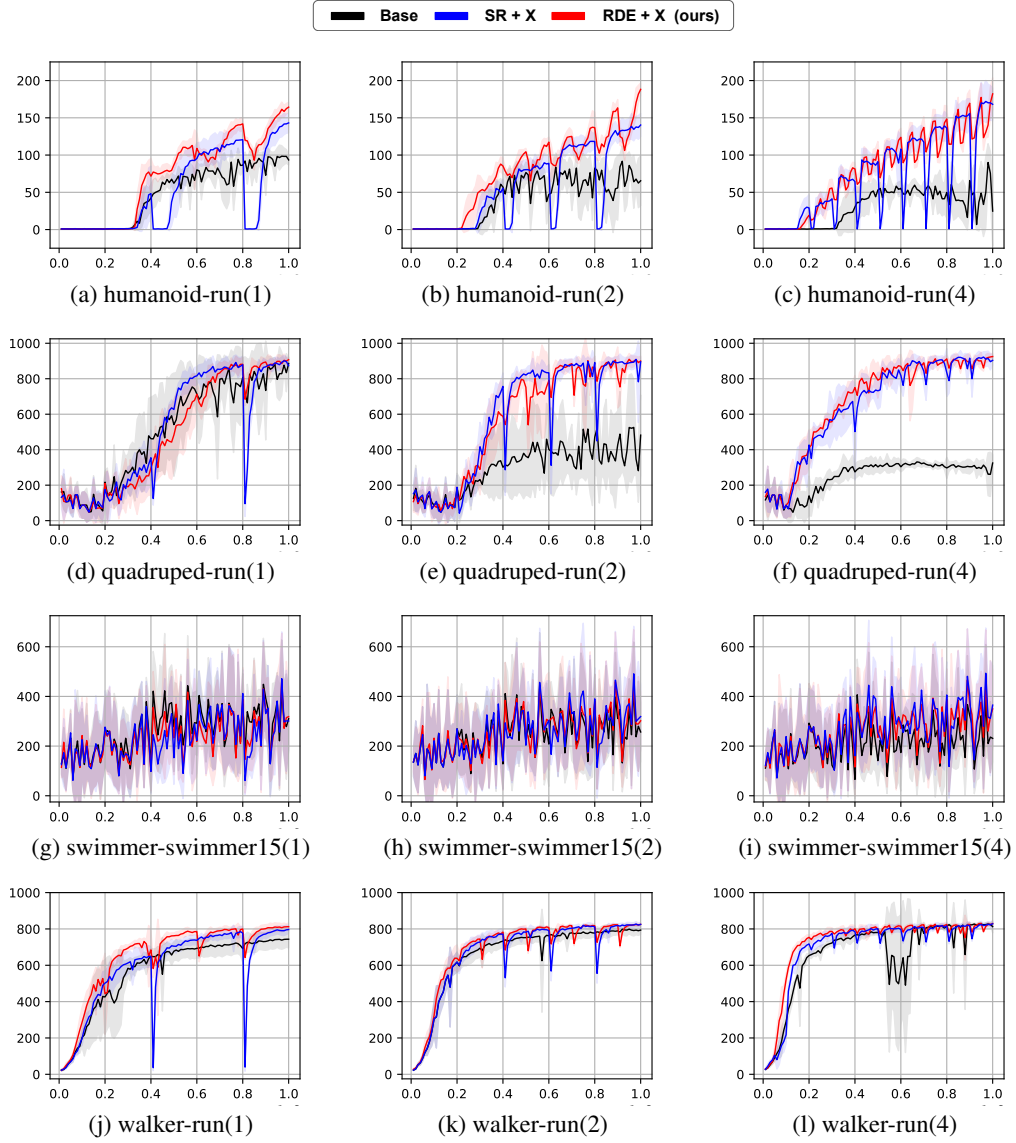

Figure 8: Per-environment performance in DMC with varying replay ratio values. Note that the number in parentheses indicates the replay ratio. The scale of the x-axis is  $10^6$ . Performances are averaged over 5 seeds.

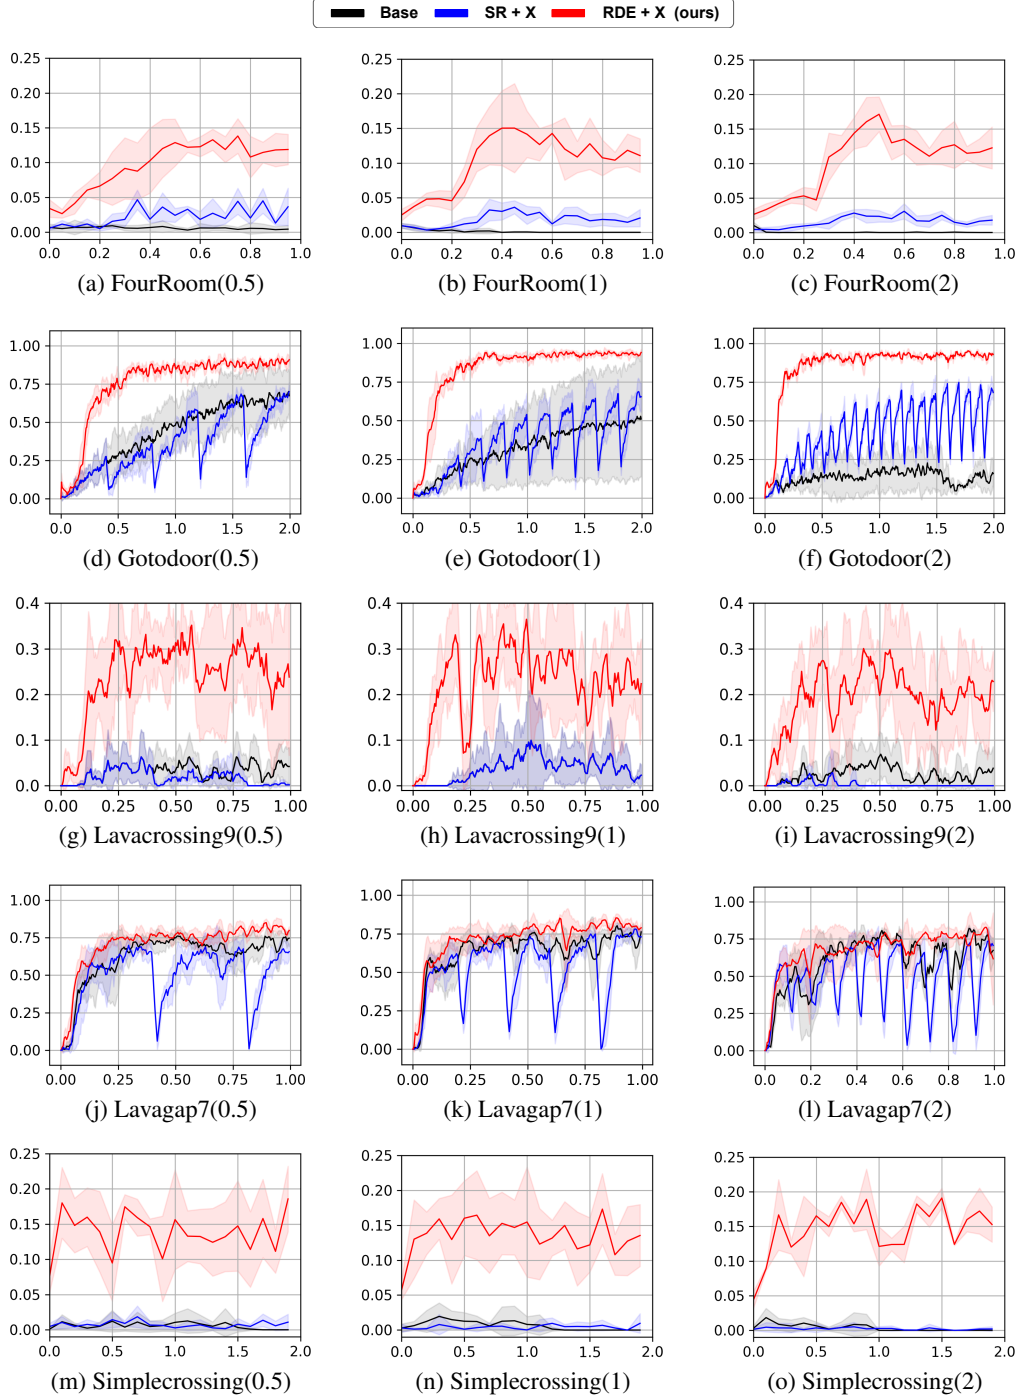

Figure 9: Per-environment performance in minigird with varying replay ratio values. Note that the number in parentheses indicates the replay ratio. The scale of the x-axis is  $10^6$ . Performances are averaged over 5 seeds.



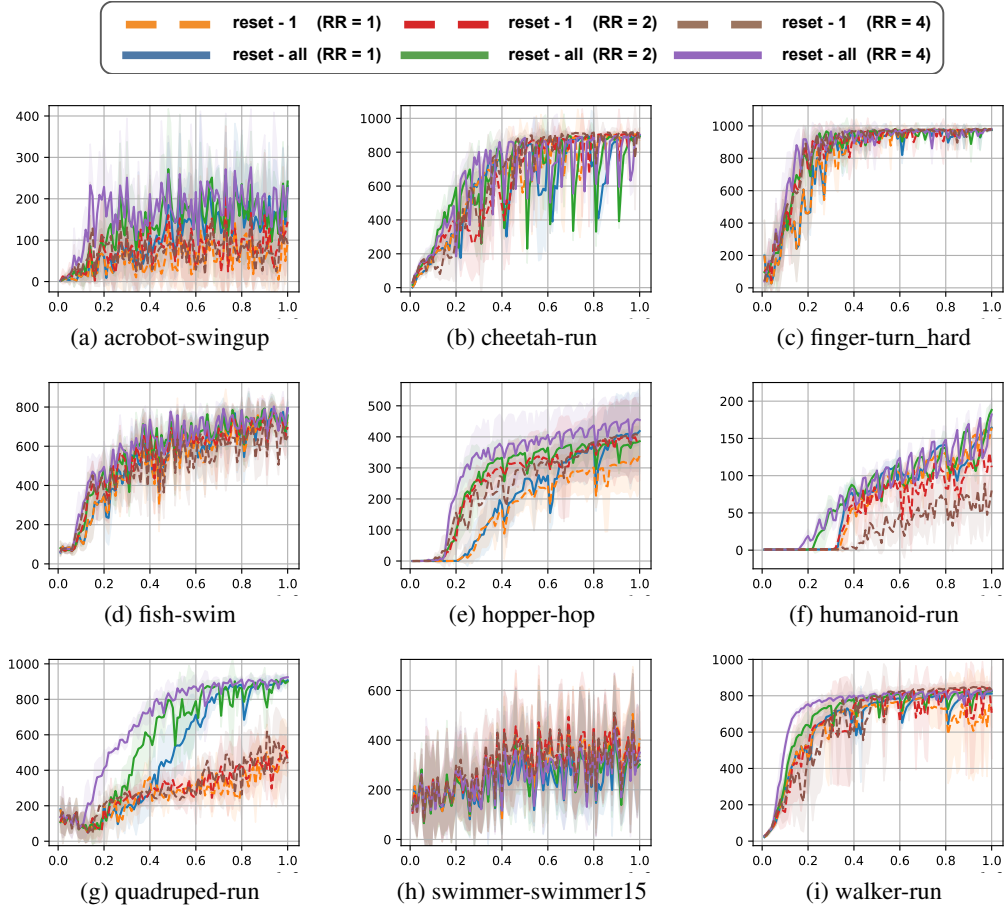

Figure 10: Per-environment performance in DMC with varying replay ratio values. Note that the number in parentheses indicates the replay ratio. The scale of the x-axis is  $10^6$ . Performances are averaged over 5 seeds.
